# Supplementary material for: Subtype-specific role for Jagged1 in promoting or inhibiting breast tumor formation
Source: PubMed Central journal article supplement (PMC11785972; doi:10.1038/s41389-025-00545-6), 2025-01-31

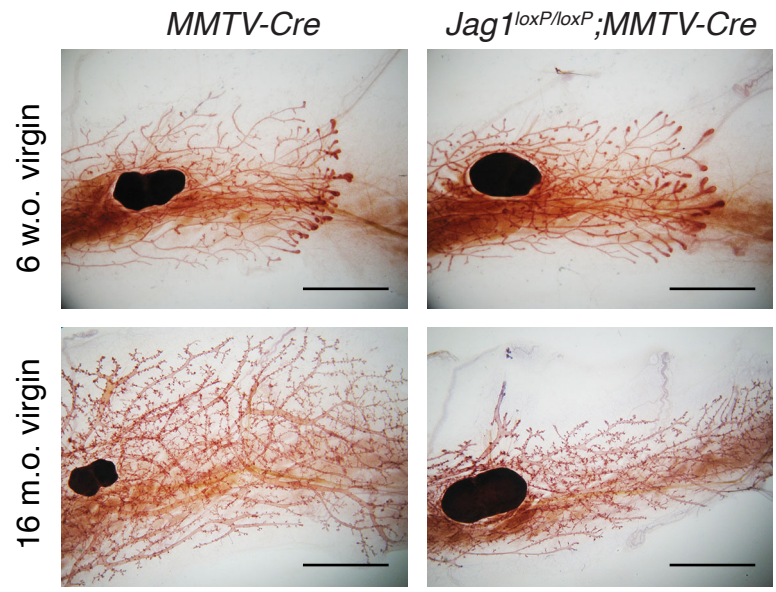

Supplement: 41389_2025_545_MOESM3_ESM.pdf [file 41389_2025_545_MOESM3_ESM.pdf]
